# Supplementary material for: Genome size versus geographic range size in birds
Source: PeerJ. 2021 Feb 10;9:e10868. doi: 10.7717/peerj.10868 (PMC7881720; doi:10.7717/peerj.10868)
Supplement: Supplemental Information 1 — Data on bird genome size, chromosome number, body mass, brain mass, geographic coordinates and geographic range size. Data are in sheet “Data”. Description of variables is in the sheet “Description”. [file peerj-09-10868-s001.xlsx]

## Sheet: Data
Species	Order	Species_lables	Genome_C_value	Genome_Chr	Body_mass	Brain_mass	Range	X	Y
Accipiter nisus	Accipitriformes	Accipiter_nisus	1.12	66	220.79	2.95691	3.67477e+07	74.8009	47.5122
Accipiter striatus	Accipitriformes	Accipiter_striatus	1.55	NA	130.59	2.31028	2.08016e+07	-97.0831	33.2291
Actitis hypoleucos	Charadriiformes	Actitis_hypoleucos	1.42	86	48	0.8	6.12348e+07	68.2826	32.2509
Adelomyia melanogenys	Apodiformes	Adelomyia_melanogenys	1.08	NA	4.93	NA	619892	-73.0245	-4.78783
Agapornis roseicollis	Psittaciformes	Agapornis_roseicollis	1.23	48	53.83	1.92696	457191	15.9605	-20.5637
Agelaius phoeniceus	Passeriformes	Agelaius_phoeniceus	1.3	NA	50.78	1.75084	1.41329e+07	-102.957	44.3635
Aglaeactis castelnaudii	Apodiformes	Aglaeactis_castelnaudii	1.18	NA	6.7	NA	23294.9	-73.6486	-12.2708
Aglaeactis cupripennis	Apodiformes	Aglaeactis_cupripennis	1.19	NA	7.6	NA	224827	-76.6674	-4.0759
Aimophila stolzmanni	Passeriformes	Aimophila_stolzmanni	1.43	NA	25.57	NA	49005.9	-80.0187	-5.35396
Alcedo atthis	Coraciiformes	Alcedo_atthis	1.4	138	31.09	0.76664	2.81564e+07	73.5856	37.7169
Amadina fasciata	Passeriformes	Amadina_fasciata	1.04	78	18	0.61124	3.34755e+06	22.1494	2.74737
Amazilia amazilia	Apodiformes	Amazilia_amazilia	1.06	NA	4.3	NA	169533	-79.1125	-6.40708
Amazilia chionogaster	Apodiformes	Amazilia_chionogaster	1.24	NA	5.04	NA	488834	-69.4779	-16.2768
Amazilia lactea	Apodiformes	Amazilia_lactea	0.97	NA	4.6	NA	1.65247e+06	-46.9466	-16.7339
Amazilia viridicauda	Apodiformes	Amazilia_viridicauda	1.25	NA	6.1	NA	28876.3	-73.5564	-11.9291
Amazona aestiva	Psittaciformes	Amazona_aestiva	1.61	NA	451	8.53664	4.21794e+06	-54.397	-18.8542
Amazona albifrons	Psittaciformes	Amazona_albifrons	1.47	NA	206	5.47008	546662	-92.7513	17.9641
Amazona amazonica	Psittaciformes	Amazona_amazonica	1.41	NA	370	8.58844	7.38266e+06	-58.9161	-4.98065
Amazona auropalliata	Psittaciformes	Amazona_auropalliata	1.75	NA	476.94	9.91452	128978	-87.6282	13.6263
Amazona autumnalis	Psittaciformes	Amazona_autumnalis	1.52	NA	416	8.42268	976908	-86.427	14.1279
Amazona barbadensis	Psittaciformes	Amazona_barbadensis	1.6	NA	270	NA	4371.75	-67.9359	11.1728
Amazona brasiliensis	Psittaciformes	Amazona_brasiliensis	1.62	NA	327.37	7.4585	4747.08	-48.0371	-25.1233
Amazona collaria	Psittaciformes	Amazona_collaria	1.53	NA	187	NA	5428.92	-77.2933	18.1809
Amazona farinosa	Psittaciformes	Amazona_farinosa	1.63	NA	625.99	10.505	6.79356e+06	-63.3657	-3.6296
Amazona finschi	Psittaciformes	Amazona_finschi	1.54	NA	302	7.55	112128	-105.076	22.4544
Amazona leucocephala	Psittaciformes	Amazona_leucocephala	1.65	NA	235.34	5.83268	31234.1	-78.7156	21.6725
Amazona ochrocephala	Psittaciformes	Amazona_ochrocephala	1.66	NA	476.94	8.95104	6.63496e+06	-64.3584	-1.7595
Amazona pretrei	Psittaciformes	Amazona_pretrei	1.41	NA	272.76	5.027	10428	-52.0299	-28.8478
Amazona tucumana	Psittaciformes	Amazona_tucumana	1.49	NA	260	NA	69167	-64.391	-23.0008
Amazona ventralis	Psittaciformes	Amazona_ventralis	1.65	NA	214	6.18492	15381.9	-68.5094	18.4144
Amazona viridigenalis	Psittaciformes	Amazona_viridigenalis	1.54	NA	316	7.13804	159492	-109.93	30.5401
Amazona vittata	Psittaciformes	Amazona_vittata	1.58	NA	279.28	5.93628	177.428	-65.9314	18.2947
Ammodramus aurifrons	Passeriformes	Ammodramus_aurifrons	1.35	NA	17.8	NA	3.86643e+06	-66.5285	-3.97883
Ammodramus savannarum	Passeriformes	Ammodramus_savannarum	1.32	NA	17.61	0.6734	7.93253e+06	-95.6849	35.9316
Ampelioides tschudii	Passeriformes	Ampelioides_tschudii	1.62	NA	78.4	NA	200992	-74.9547	-4.88344
Ampelion rubrocristatus	Passeriformes	Ampelion_rubrocristatus	1.34	NA	66.29	NA	413342	-74.7014	-4.06761
Anairetes alpinus	Passeriformes	Anairetes_alpinus	1.24	NA	9	NA	11612.7	-75.9677	-10.5889
Anairetes flavirostris	Passeriformes	Anairetes_flavirostris	1.32	NA	6	NA	2.04752e+06	-66.0118	-29.798
Anairetes nigrocristatus	Passeriformes	Anairetes_nigrocristatus	1.27	NA	6.85	NA	48574.5	-77.8608	-7.71985
Anas capensis	Anseriformes	Anas_capensis	1.41	NA	402	NA	4.31738e+06	23.2159	-18.0408
Anas castanea	Anseriformes	Anas_castanea	1.36	82	624.01	3.86428	3.13486e+06	139.431	-30.0222
Anas platyrhynchos	Anseriformes	Anas_platyrhynchos	1.54	NA	843.42	5.63584	4.35667e+07	9.87889	47.0908
Anastomus lamelligerus	Ciconiiformes	Anastomus_lamelligerus	1.62	NA	1081	10.6501	1.34098e+07	24.1901	-1.03252
Ancistrops strigilatus	Passeriformes	Ancistrops_strigilatus	1.43	NA	35.9	NA	2.50749e+06	-67.879	-5.93026
Anisognathus somptuosus	Passeriformes	Anisognathus_somptuosus	1.14	NA	44	1.3	319520	-75.6034	-1.73019
Anodorhynchus hyacinthinus	Psittaciformes	Anodorhynchus_hyacinthinus	1.43	70	1331	24.5	520495	-52.6781	-11.6264
Anthracothorax nigricollis	Apodiformes	Anthracothorax_nigricollis	1.1	NA	7	NA	9.8085e+06	-59.0276	-9.16334
Anthus crenatus	Passeriformes	Anthus_crenatus	1.18	NA	30.7	NA	343608	25.5163	-30.2968
Anthus richardi	Passeriformes	Anthus_richardi	1.29	NA	32.17	NA	9.82829e+06	27.94	-10.3864
Anthus similis	Passeriformes	Anthus_similis	1.26	NA	25.3	NA	9.28397e+06	44.9913	7.48374
Apus affinis	Apodiformes	Apus_affinis	1.38	NA	22.57	NA	2.21462e+07	30.3499	4.95189
Apus caffer	Apodiformes	Apus_caffer	1.18	NA	22.1	NA	1.24932e+07	24.1237	-2.32973
Ara ambiguus	Psittaciformes	Ara_ambiguus	1.37	NA	1300	18.13	108294	-79.7797	8.39471
Ara ararauna	Psittaciformes	Ara_ararauna	1.45	NA	1125	18.7309	7.78873e+06	-60.8239	-6.566
Ara chloropterus	Psittaciformes	Ara_chloropterus	1.37	70	1214	21.6317	8.10127e+06	-61.953	-5.12095
Ara macao	Psittaciformes	Ara_macao	1.43	62	1015	18.5755	6.75532e+06	-63.8977	-2.86196
Ara militaris	Psittaciformes	Ara_militaris	1.38	NA	1134	19.5079	281778	-74.3952	-3.20195
Ara rubrogenys	Psittaciformes	Ara_rubrogenys	1.42	NA	468	NA	7426.04	-64.8592	-18.3454
Ara severus	Psittaciformes	Ara_severus	1.34	NA	343	10.4118	5.8278e+06	-64.8276	-4.1936
Aratinga solstitialis	Psittaciformes	Aratinga_solstitialis	1.37	NA	119.62	4.7138	96353.3	-60.4483	3.12171
Archilochus alexandri	Apodiformes	Archilochus_alexandri	1.18	NA	3.39	NA	3.87243e+06	-110.115	34.2059
Ardea cinerea	Pelecaniformes	Ardea_cinerea	1.39	68	1443	8.1325	5.20086e+07	59.949	28.6066
Ardea herodias	Pelecaniformes	Ardea_herodias	1.47	NA	2523.41	9.19968	1.53553e+07	-98.7902	39.4449
Ardeotis kori	Otidiformes	Ardeotis_kori	1.42	NA	7994.16	13.4	3.56579e+06	26.2837	-16.306
Argusianus argus	Galliformes	Argusianus_argus	1.52	NA	1959.93	5.88448	1.35453e+06	108.393	1.09251
Arremon brunneinucha	Passeriformes	Arremon_brunneinucha	1.37	NA	43.97	1.59544	618821	-80.5316	4.89783
Arremon taciturnus	Passeriformes	Arremon_taciturnus	1.54	NA	24.8	NA	6.75493e+06	-55.317	-6.07927
Arremon torquatus	Passeriformes	Arremon_torquatus	1.65	NA	41.96	NA	302812	-75.8266	-2.27313
Asthenes dorbignyi	Passeriformes	Asthenes_dorbignyi	1.3	NA	15.9	NA	252318	-66.5323	-24.3781
Asthenes humilis	Passeriformes	Asthenes_humilis	1.31	NA	21	NA	145053	-73.8481	-12.2486
Asthenes ottonis	Passeriformes	Asthenes_ottonis	1.31	NA	13	NA	48172.6	-72.8594	-13.4543
Asthenes virgata	Passeriformes	Asthenes_virgata	1.44	NA	22	NA	46690.4	-73.7469	-12.6148
Athene noctua	Strigiformes	Athene_noctua	1.67	80	168.92	3.8332	2.69188e+07	60.3919	40.3592
Atlapetes canigenis	Passeriformes	Atlapetes_canigenis	1.56	NA	32.17	NA	35227.8	-72.7553	-12.6235
Atlapetes forbesi	Passeriformes	Atlapetes_forbesi	1.34	NA	32.17	NA	18195.9	-73.1847	-13.7081
Atlapetes rufigenis	Passeriformes	Atlapetes_rufigenis	1.35	NA	32.17	NA	21316.4	-77.6196	-8.94046
Atlapetes seebohmi	Passeriformes	Atlapetes_seebohmi	1.45	NA	32.17	NA	47526.6	-79.1221	-6.5126
Aulacorhynchus derbianus	Piciformes	Aulacorhynchus_derbianus	1.69	NA	209.71	NA	302346	-73.2982	-10.2273
Aulacorhynchus prasinus	Piciformes	Aulacorhynchus_prasinus	1.67	NA	170.56	NA	420105	-91.1515	16.5026
Baeolophus inornatus	Passeriformes	Baeolophus_inornatus	1.32	NA	15.87	NA	178291	-119.566	35.9784
Balearica pavonina	Gruiformes	Balearica_pavonina	1.51	NA	3590	13.3437	2.97692e+06	23.7871	10.7186
Balearica regulorum	Gruiformes	Balearica_regulorum	1.51	NA	3771.99	NA	3.52878e+06	29.8317	-12.8103
Baryphthengus martii	Coraciiformes	Baryphthengus_martii	1.5	NA	165.02	NA	3.23277e+06	-68.8748	-6.18138
Basileuterus trifasciatus	Passeriformes	Basileuterus_trifasciatus	1.42	NA	9.7	NA	29232.5	-79.6882	-5.06729
Basileuterus tristriatus	Passeriformes	Basileuterus_tristriatus	1.45	NA	12.03	NA	474750	-74.1269	-2.60857
Batis pririt	Passeriformes	Batis_pririt	1.32	NA	9.34	NA	1.54794e+06	20.4851	-24.9203
Bolborhynchus lineola	Psittaciformes	Bolborhynchus_lineola	1.43	NA	56.2	2.15488	279199	-82.2714	5.4732
Bolborhynchus orbygnesius	Psittaciformes	Bolborhynchus_orbygnesius	1.52	NA	43.1	1.77	191142	-71.6211	-13.5252
Bombycilla cedrorum	Passeriformes	Bombycilla_cedrorum	1.24	NA	31.58	NA	1.40593e+07	-98.9512	40.634
Bonasa umbellus	Galliformes	Bonasa_umbellus	1.32	NA	530.91	2.54856	8.07639e+06	-105.836	52.8695
Bostrychia hagedash	Pelecaniformes	Bostrychia_hagedash	1.47	NA	1238	NA	1.62435e+07	21.1777	-1.03329
Bradornis mariquensis	Passeriformes	Bradornis_mariquensis	1.31	NA	25.18	NA	1.65127e+06	22.2677	-22.0398
Brotogeris cyanoptera	Psittaciformes	Brotogeris_cyanoptera	1.33	NA	56	NA	2.56727e+06	-70.9071	-4.69788
Bubo bubo	Strigiformes	Bubo_bubo	2.03	80	2668.51	17.7052	3.19737e+07	80.9303	49.3162
Bubo lacteus	Strigiformes	Bubo_lacteus	1.66	NA	2114.94	17.5	1.13021e+07	25.7078	-5.27276
Bucorvus abyssinicus	Bucerotiformes	Bucorvus_abyssinicus	1.43	90	4000	24.605	4.48346e+06	13.3946	9.55805
Buteo buteo	Accipitriformes	Buteo_buteo	1.31	68	759.1	8.22584	2.19727e+07	36.045	32.5057
Cacatua alba	Psittaciformes	Cacatua_alba	1.28	NA	570	14.6698	59746.8	123.591	14.9537
Cacatua galerita	Psittaciformes	Cacatua_galerita	1.38	NA	720.43	14.7526	3.96911e+06	142.237	-22.0631
Cacatua moluccensis	Psittaciformes	Cacatua_moluccensis	1.54	NA	834.99	16.1927	18195.3	129.401	-3.22271
Cacatua roseicapilla	Psittaciformes	Cacatua_roseicapilla	1.43	NA	325.33	6.66148	7.02045e+06	135.229	-25.6498
Cacatua sanguinea	Psittaciformes	Cacatua_sanguinea	1.71	NA	523.69	9.23076	5.31662e+06	136.775	-25.5185
Cacatua sulphurea	Psittaciformes	Cacatua_sulphurea	1.43	NA	303.34	9.96632	259751	121.299	-4.15127
Cairina moschata	Anseriformes	Cairina_moschata	1.33	NA	2415.78	7.6146	1.49967e+07	-61.913	-4.83394
Calidris alpina	Charadriiformes	Calidris_alpina	1.28	88	51.89	1.036	2.19415e+07	-21.476	51.5811
Caloenas nicobarica	Columbiformes	Caloenas_nicobarica	1.54	NA	537.86	3.17016	475666	127.467	-0.33906
Calypte anna	Apodiformes	Calypte_anna	1.14	NA	4.24	NA	1.27136e+06	-118.482	40.3834
Calyptomena viridis	Passeriformes	Calyptomena_viridis	1.31	NA	58.5	1.32	1.4574e+06	107.768	1.68537
Campephilus haematogaster	Piciformes	Campephilus_haematogaster	1.51	NA	237	NA	304564	-75.6768	-6.21983
Campephilus rubricollis	Piciformes	Campephilus_rubricollis	1.39	NA	210.71	NA	6.91088e+06	-62.185	-4.60051
Campethera abingoni	Piciformes	Campethera_abingoni	1.56	NA	67.52	NA	6.43806e+06	26.2495	-14.3303
Camptostoma obsoletum	Passeriformes	Camptostoma_obsoletum	1.2	NA	8.1	0.37296	1.44289e+07	-58.7227	-9.88092
Campylopterus largipennis	Apodiformes	Campylopterus_largipennis	1	NA	8.3	0.32116	6.51163e+06	-61.3443	-4.54264
Campylopterus villaviscensio	Apodiformes	Campylopterus_villaviscensio	1.18	NA	7.38	NA	36514.9	-77.9073	-2.20418
Campylorhamphus trochilirostris	Passeriformes	Campylorhamphus_trochilirostris	1.2	NA	40.8	NA	7.3928e+06	-58.9127	-10.0746
Campylorhynchus fasciatus	Passeriformes	Campylorhynchus_fasciatus	1.43	NA	30	NA	121194	-79.6987	-4.87539
Capito auratus	Piciformes	Capito_auratus	1.42	NA	57.37	NA	3.11699e+06	-68.976	-3.43286
Caprimulgus rufigena	Caprimulgiformes	Caprimulgus_rufigena	1.16	NA	51.96	NA	3.24467e+06	22.244	-20.4751
Cardinalis cardinalis	Passeriformes	Cardinalis_cardinalis	1.37	NA	42.64	1.57472	5.85412e+06	-92.5804	34.8198
Cariama cristata	Cariamiformes	Cariama_cristata	1.5	NA	1400	11.5514	5.93147e+06	-51.5454	-19.2596
Catamblyrhynchus diadema	Passeriformes	Catamblyrhynchus_diadema	1.29	NA	14.13	NA	358372	-74.2586	-4.37866
Catharus dryas	Passeriformes	Catharus_dryas	1.4	NA	37.7	NA	466866	-75.9763	-3.33511
Catharus fuscescens	Passeriformes	Catharus_fuscescens	1.34	NA	31.9	0.95312	1.34977e+07	-85.2591	27.5548
Catharus guttatus	Passeriformes	Catharus_guttatus	1.4	NA	30.1	NA	1.45972e+07	-103.478	45.5583
Catharus minimus	Passeriformes	Catharus_minimus	1.31	NA	31.58	NA	1.77707e+07	-82.4645	43.9544
Catharus ustulatus	Passeriformes	Catharus_ustulatus	1.42	NA	30.3	NA	1.09416e+07	-100.882	36.9306
Cereopsis novaehollandiae	Anseriformes	Cereopsis_novaehollandiae	1.42	80	3559.99	9.14788	595775	141.703	-36.312
Certhia americana	Passeriformes	Certhia_americana	1.2	NA	8.1	NA	1.2117e+07	-100.283	43.1414
Chaetura egregia	Apodiformes	Chaetura_egregia	1.13	NA	23.4	NA	1.75689e+06	-64.9062	-11.0807
Chaetura vauxi	Apodiformes	Chaetura_vauxi	1.21	NA	17.1	NA	3.79636e+06	-110.579	34.9159
Chalcopsitta atra	Psittaciformes	Chalcopsitta_atra	1.25	NA	195	5.7472	77411.4	132.796	-1.82833
Chalcostigma herrani	Apodiformes	Chalcostigma_herrani	0.99	NA	5.8	NA	75962.8	-77.8666	-0.188531
Chalcostigma ruficeps	Apodiformes	Chalcostigma_ruficeps	1.18	NA	3.4	NA	123489	-72.9812	-11.973
Chalcostigma stanleyi	Apodiformes	Chalcostigma_stanleyi	1.21	NA	5.8	NA	120326	-73.985	-10.1326
Chamaea fasciata	Passeriformes	Chamaea_fasciata	1.35	NA	14.73	0.79772	246144	-120.893	38.1543
Chamaeza campanisona	Passeriformes	Chamaeza_campanisona	1.28	NA	90.58	1.9	1.80106e+06	-55.18	-16.3382
Chelidoptera tenebrosa	Piciformes	Chelidoptera_tenebrosa	1.28	NA	35.9	0.8806	8.68819e+06	-60.3614	-4.75024
Chen rossii	Anseriformes	Chen_rossii	1.38	82	1635.99	7.0966	2.90737e+06	-103.596	46.2733
Chiroxiphia boliviana	Passeriformes	Chiroxiphia_boliviana	1.23	NA	17.13	NA	78890.1	-67.0865	-15.9254
Chlorospingus flavigularis	Passeriformes	Chlorospingus_flavigularis	1.45	NA	25.6	NA	200269	-76.2041	-4.38081
Chordeiles acutipennis	Caprimulgiformes	Chordeiles_acutipennis	1.45	NA	48.42	NA	1.07194e+07	-68.5676	2.80705
Chrysococcyx caprius	Cuculiformes	Chrysococcyx_caprius	1.45	NA	32.79	0.79772	1.89187e+07	21.4063	-2.46874
Chrysolophus pictus	Galliformes	Chrysolophus_pictus	1.21	82	555.2	3.43952	975614	104.89	29.9133
Chrysuronia oenone	Apodiformes	Chrysuronia_oenone	0.96	NA	5.04	NA	1.33708e+06	-73.0837	-4.42191
Ciconia abdimii	Ciconiiformes	Ciconia_abdimii	1.53	NA	1398	8.3	1.76493e+07	22.3264	-1.15949
Ciconia ciconia	Ciconiiformes	Ciconia_ciconia	1.58	NA	3445.8	15.1981	3.03327e+07	27.5195	19.594
Ciconia episcopus	Ciconiiformes	Ciconia_episcopus	1.61	NA	2061	10.8	3.85824e+06	91.1135	17.4482
Ciconia maguari	Ciconiiformes	Ciconia_maguari	1.54	NA	3994.99	20.5	5.19187e+06	-59.83	-18.744
Ciconia stormi	Ciconiiformes	Ciconia_stormi	1.68	NA	3086.33	NA	1.01328e+06	109.179	0.203402
Cinclodes albidiventris	Passeriformes	Cinclodes_albidiventris	1.37	NA	30	0.91168	100200	-76.415	1.52738
Cinclus leucocephalus	Passeriformes	Cinclus_leucocephalus	1.28	NA	44	NA	620153	-74.6316	-6.04434
Circus aeruginosus	Accipitriformes	Circus_aeruginosus	1.43	72	704.07	5.76653	2.98e+07	43.0239	31.7769
Circus cyaneus	Accipitriformes	Circus_cyaneus	1.42	72	392.98	4.95208	3.82113e+07	75.7485	49.4062
Circus pygargus	Accipitriformes	Circus_pygargus	1.46	72	310.75	NA	3.02554e+07	33.2312	27.6342
Cissopis leverianus	Passeriformes	Cissopis_leverianus	1.25	NA	76	1.77156	5.41078e+06	-60.8439	-9.51712
Cisticola aridulus	Passeriformes	Cisticola_aridulus	1.24	NA	9.2	NA	4.46832e+06	23.2125	-10.9843
Cisticola chiniana	Passeriformes	Cisticola_chiniana	1.23	NA	16.14	NA	6.71613e+06	27.7047	-11.5351
Cisticola fulvicapilla	Passeriformes	Cisticola_fulvicapilla	1.15	NA	8.24	0.52836	4.60461e+06	26.948	-18.6167
Cisticola juncidis	Passeriformes	Cisticola_juncidis	1.16	NA	6.81	NA	1.89302e+07	64.3767	10.7173
Cisticola subruficapilla	Passeriformes	Cisticola_subruficapilla	1.12	NA	9.92	NA	910757	20.0882	-28.0685
Cisticola textrix	Passeriformes	Cisticola_textrix	1.16	NA	10.34	NA	702825	25.9099	-26.135
Clamator jacobinus	Cuculiformes	Clamator_jacobinus	1.4	NA	79.37	NA	1.8575e+07	34.9305	3.37245
Coeligena iris	Apodiformes	Coeligena_iris	1.04	NA	6.9	NA	80718.3	-78.4708	-5.98884
Coeligena torquata	Apodiformes	Coeligena_torquata	1.2	NA	6.72	NA	302885	-76.2705	-0.768387
Coeligena violifer	Apodiformes	Coeligena_violifer	1.21	NA	7.39	NA	43528.2	-66.4599	-16.7244
Coereba flaveola	Passeriformes	Coereba_flaveola	1.49	NA	10.01	0.45584	1.08064e+07	-57.2477	-6.95449
Colaptes atricollis	Piciformes	Colaptes_atricollis	1.51	NA	76.1	NA	155688	-76.5083	-10.8825
Colaptes rivolii	Piciformes	Colaptes_rivolii	1.54	NA	102	NA	463710	-75.8221	-0.00938562
Colaptes rubiginosus	Piciformes	Colaptes_rubiginosus	1.54	NA	55.79	NA	2.24233e+06	-73.1155	4.06967
Colaptes rupicola	Piciformes	Colaptes_rupicola	1.48	NA	174	NA	785410	-69.2575	-17.5051
Colibri coruscans	Apodiformes	Colibri_coruscans	1.02	NA	6.7	0.24	920571	-71.9982	-8.84728
Colibri thalassinus	Apodiformes	Colibri_thalassinus	1.15	NA	5.9	0.19	788233	-83.0288	6.27251
Colius colius	Coliiformes	Colius_colius	1.47	NA	41.4	NA	1.61155e+06	20.6475	-26.5012
Columba livia	Columbiformes	Columba_livia	1.65	80	354.2	2.26815	2.73852e+07	57.3389	35.8288
Conirostrum ferrugineiventre	Passeriformes	Conirostrum_ferrugineiventre	1.4	NA	11.5	NA	147474	-71.066	-13.7153
Conopophaga castaneiceps	Passeriformes	Conopophaga_castaneiceps	1.45	NA	27	NA	160297	-76.2406	-2.02963
Contopus cinereus	Passeriformes	Contopus_cinereus	1.24	NA	11.6	NA	3.8378e+06	-49.3253	-17.1527
Contopus fumigatus	Passeriformes	Contopus_fumigatus	1.13	NA	19.9	NA	1.02105e+06	-70.8223	-3.57308
Contopus virens	Passeriformes	Contopus_virens	1.15	NA	13.9	0.4662	1.06024e+07	-79.2064	19.7645
Coracias garrulus	Coraciiformes	Coracias_garrulus	1.28	NA	146	2.40352	3.42444e+07	32.4295	21.9682
Corvus brachyrhynchos	Passeriformes	Corvus_brachyrhynchos	1.27	NA	448.76	7.42812	1.1054e+07	-98.3588	45.7991
Corvus corax	Passeriformes	Corvus_corax	1.21	80	927.97	14.9702	5.2332e+07	18.8024	54.8038
Corvus corone	Passeriformes	Corvus_corone	1.23	NA	570	8.81636	3.41184e+07	79.3441	52.7802
Corvus monedula	Passeriformes	Corvus_monedula	1.25	80	246	5.3354	1.51407e+07	46.1622	47.6164
Coryphospingus cucullatus	Passeriformes	Coryphospingus_cucullatus	1.3	NA	14.28	0.69412	4.91403e+06	-56.2777	-21.0943
Coturnix coturnix	Galliformes	Coturnix_coturnix	1.35	78	96.28	0.97384	3.47753e+07	45.5294	34.9266
Coturnix japonica	Galliformes	Coturnix_japonica	1.29	78	94.78	NA	9.04905e+06	113.299	39.0509
Cranioleuca albicapilla	Passeriformes	Cranioleuca_albicapilla	1.26	NA	21.29	NA	18584.5	-73.5734	-12.3929
Cranioleuca antisiensis	Passeriformes	Cranioleuca_antisiensis	1.34	NA	16.87	NA	106848	-78.1383	-7.25539
Cranioleuca marcapatae	Passeriformes	Cranioleuca_marcapatae	1.28	NA	19.8	NA	15353.4	-71.5863	-13.1544
Crotophaga ani	Cuculiformes	Crotophaga_ani	1.34	NA	110.09	1.61616	1.41187e+07	-58.6637	-8.83061
Crotophaga sulcirostris	Cuculiformes	Crotophaga_sulcirostris	1.33	NA	82.04	NA	2.71941e+06	-86.0389	12.7256
Crypturellus obsoletus	Tinamiformes	Crypturellus_obsoletus	1.35	NA	443.4	3.3	1.84171e+06	-56.7588	-18.1712
Cyanocitta cristata	Passeriformes	Cyanocitta_cristata	1.32	NA	88	3.02512	6.80985e+06	-90.5025	43.1805
Cyanoliseus patagonus	Psittaciformes	Cyanoliseus_patagonus	1.32	NA	277.88	8.52628	1.21757e+06	-65.1794	-36.7272
Cyclarhis gujanensis	Passeriformes	Cyclarhis_gujanensis	1.42	NA	28.8	1.30536	1.34855e+07	-58.3019	-10.1857
Cygnus atratus	Anseriformes	Cygnus_atratus	1.45	NA	5623.16	12.5874	7.02804e+06	134.441	-25.356
Cygnus buccinator	Anseriformes	Cygnus_buccinator	1.54	NA	11071.1	21.0204	1.61344e+06	-129.509	56.858
Cygnus olor	Anseriformes	Cygnus_olor	1.48	80	10682	22.5	6.11193e+06	41.0818	47.8787
Cyphorhinus thoracicus	Passeriformes	Cyphorhinus_thoracicus	1.27	NA	31.28	NA	58756.4	-72.9012	-12.2329
Dacnis cayana	Passeriformes	Dacnis_cayana	1.45	NA	13	0.5698	1.20586e+07	-58.0464	-7.0927
Deconychura longicauda	Passeriformes	Deconychura_longicauda	1.26	NA	23.8	NA	1.09368e+06	-56.7324	1.73029
Dendrocincla fuliginosa	Passeriformes	Dendrocincla_fuliginosa	1.31	NA	38.7	1.09816	8.48771e+06	-62.9791	-3.30239
Dendrocincla merula	Passeriformes	Dendrocincla_merula	1.16	NA	49.99	NA	5.35851e+06	-62.4564	-2.96205
Dendrocolaptes picumnus	Passeriformes	Dendrocolaptes_picumnus	1.15	NA	76.6	NA	5.75013e+06	-64.5604	-4.18294
Dendrocygna viduata	Anseriformes	Dendrocygna_viduata	1.37	NA	689.99	4.9	2.74202e+07	-2.47007	-6.6129
Deroptyus accipitrinus	Psittaciformes	Deroptyus_accipitrinus	1.43	NA	246	8.01864	4.158e+06	-58.6887	-2.14403
Dicrurus adsimilis	Passeriformes	Dicrurus_adsimilis	1.13	NA	40.3	NA	1.46146e+07	23.6424	-4.44631
Diglossa albilatera	Passeriformes	Diglossa_albilatera	1.32	NA	9.84	NA	254313	-75.7783	1.6033
Diglossa caerulescens	Passeriformes	Diglossa_caerulescens	1.3	NA	14.44	NA	280564	-74.4477	-3.4444
Diglossa cyanea	Passeriformes	Diglossa_cyanea	1.23	NA	17.04	NA	392129	-74.786	-2.98035
Diglossa humeralis	Passeriformes	Diglossa_humeralis	1.29	NA	13.14	NA	155424	-76.3426	1.9377
Diglossa mystacalis	Passeriformes	Diglossa_mystacalis	1.17	NA	16.2	NA	121192	-72.5041	-12.427
Diglossa sittoides	Passeriformes	Diglossa_sittoides	1.31	NA	9	NA	592478	-72.4986	-7.65015
Diopsittaca nobilis	Psittaciformes	Diopsittaca_nobilis	1.33	NA	150.91	6.05024	495140	-59.6648	5.88775
Dolichonyx oryzivorus	Passeriformes	Dolichonyx_oryzivorus	1.32	NA	31.46	1.10852	1.25385e+07	-80.8975	21.9507
Doryfera ludovicae	Apodiformes	Doryfera_ludovicae	1.28	NA	6	NA	387163	-74.6536	-2.44523
Dromaius novaehollandiae	Casuariiformes	Dromaius_novaehollandiae	1.55	80	34093.2	29.9197	6.73216e+06	134.766	-25.9799
Dubusia taeniata	Passeriformes	Dubusia_taeniata	1.56	NA	37	NA	212510	-75.6151	2.70878
Ducula bicolor	Columbiformes	Ducula_bicolor	1.6	NA	440.01	3.1598	626183	112.488	1.51891
Dumetella carolinensis	Passeriformes	Dumetella_carolinensis	1.32	NA	35.3	1.18104	8.53505e+06	-94.5077	39.3401
Eclectus roratus	Psittaciformes	Eclectus_roratus	1.67	NA	480.76	7.62496	840033	140.835	-5.3348
Elaenia albiceps	Passeriformes	Elaenia_albiceps	1.32	NA	15.5	NA	1.30046e+07	-60.4091	-18.6061
Elaenia chiriquensis	Passeriformes	Elaenia_chiriquensis	1.25	NA	15.4	NA	7.20496e+06	-56.1546	-7.17645
Elaenia pallatangae	Passeriformes	Elaenia_pallatangae	1.25	NA	17.8	NA	280932	-75.3173	-6.60153
Emberiza flaviventris	Passeriformes	Emberiza_flaviventris	1.38	NA	18.24	0.54	6.96915e+06	24.2525	-10.837
Emberiza tahapisi	Passeriformes	Emberiza_tahapisi	1.25	NA	12.98	NA	4.09304e+06	29.1935	-12.9007
Empidonax alnorum	Passeriformes	Empidonax_alnorum	1.22	NA	12.7	NA	1.34088e+07	-96.1078	39.6269
Empidonax minimus	Passeriformes	Empidonax_minimus	1.2	NA	10	0.38332	1.14826e+07	-98.2934	43.1516
Enicognathus leptorhynchus	Psittaciformes	Enicognathus_leptorhynchus	1.28	NA	193	7.8736	127124	-72.6421	-38.9155
Ensifera ensifera	Apodiformes	Ensifera_ensifera	1.16	NA	11.2	NA	398294	-74.3348	-4.8895
Epinecrophylla spodionota	Passeriformes	Epinecrophylla_spodionota	1.37	NA	10.7	NA	124491	-75.8841	-6.47802
Eriocnemis luciani	Apodiformes	Eriocnemis_luciani	1.21	NA	6	NA	37938.3	-78.4087	-0.783568
Erithacus rubecula	Passeriformes	Erithacus_rubecula	1.82	NA	17.7	0.66304	1.3062e+07	31.2369	50.4261
Erythropygia paena	Passeriformes	Erythropygia_paena	1.23	NA	19.7	NA	1.90928e+06	21.4593	-22.4335
Estrilda astrild	Passeriformes	Estrilda_astrild	1.2	NA	8.29	0.35	6.01611e+06	25.5182	-11.3526
Eubucco richardsoni	Piciformes	Eubucco_richardsoni	1.62	NA	33.9	NA	636703	-74.3234	-0.650579
Eubucco versicolor	Piciformes	Eubucco_versicolor	1.6	NA	32.8	NA	125620	-69.0312	-14.5346
Eudromia elegans	Tinamiformes	Eudromia_elegans	1.24	80	702.9	2.57964	1.49336e+06	-65.9168	-37.2969
Euphagus cyanocephalus	Passeriformes	Euphagus_cyanocephalus	1.46	NA	62.48	1.49184	1.01024e+07	-105.333	40.8519
Euphonia laniirostris	Passeriformes	Euphonia_laniirostris	1.25	NA	15	NA	4.46392e+06	-67.0328	-5.67841
Euplectes afer	Passeriformes	Euplectes_afer	1.19	NA	14.29	0.677	3.11808e+06	15.1023	-3.60132
Euplectes albonotatus	Passeriformes	Euplectes_albonotatus	1.22	NA	21.05	NA	2.57525e+06	30.7418	-13.4471
Euplectes ardens	Passeriformes	Euplectes_ardens	1.12	NA	19.02	NA	3.18284e+06	24.821	-10.9639
Euplectes orix	Passeriformes	Euplectes_orix	1.19	NA	22.97	0.78736	2.96894e+06	27.6514	-20.3077
Euplectes progne	Passeriformes	Euplectes_progne	1.22	NA	35.1	NA	697866	27.1377	-24.0602
Euscarthmus meloryphus	Passeriformes	Euscarthmus_meloryphus	1.32	NA	6.8	NA	6.21725e+06	-52.4659	-15.9286
Eutoxeres condamini	Apodiformes	Eutoxeres_condamini	1.14	NA	10.79	NA	368097	-75.184	-7.71686
Falco eleonorae	Falconiformes	Falco_eleonorae	1.27	NA	390	4.18544	771779	40.5316	-8.72072
Falco peregrinus	Falconiformes	Falco_peregrinus	1.45	50	759.95	6.41284	9.01086e+07	18.0645	34.4293
Falco sparverius	Falconiformes	Falco_sparverius	1.43	NA	114.61	2.57964	2.80856e+07	-88.0544	21.7033
Falco tinnunculus	Falconiformes	Falco_tinnunculus	1.33	58	183.21	4.00932	5.89511e+07	62.5696	34.8468
Falco vespertinus	Falconiformes	Falco_vespertinus	1.47	NA	151.49	2.7972	3.40053e+07	37.0637	30.9822
Florisuga mellivora	Apodiformes	Florisuga_mellivora	1.01	NA	7.4	0.26936	8.10517e+06	-64.5899	-2.07386
Forpus coelestis	Psittaciformes	Forpus_coelestis	1.54	NA	26.14	1.38824	147237	-79.8983	-3.76622
Fringilla coelebs	Passeriformes	Fringilla_coelebs	1.12	80	23.81	0.83916	1.69572e+07	44.539	50.2334
Galbula cyanescens	Piciformes	Galbula_cyanescens	1.13	NA	25.3	NA	1.18897e+06	-70.4372	-8.02764
Gallinula chloropus	Gruiformes	Gallinula_chloropus	1.53	78	339.63	2.4864	3.90607e+07	55.3097	27.4047
Garrulus glandarius	Passeriformes	Garrulus_glandarius	1.24	80	159.46	4.04771	1.9455e+07	63.1061	51.0837
Geositta maritima	Passeriformes	Geositta_maritima	1.29	NA	16.49	NA	162425	-72.4545	-18.8382
Geothlypis trichas	Passeriformes	Geothlypis_trichas	1.44	NA	9.54	0.53872	1.5106e+07	-100.408	42.2668
Geotrygon montana	Columbiformes	Geotrygon_montana	1.51	NA	133.86	1.18104	1.3251e+07	-59.9274	-5.71494
Glaucidium peruanum	Strigiformes	Glaucidium_peruanum	1.55	NA	62.41	NA	334918	-76.8662	-9.63922
Glaucis hirsutus	Apodiformes	Glaucis_hirsutus	1.02	NA	6.76	0.259	7.81935e+06	-62.7968	-4.08703
Glyphorynchus spirurus	Passeriformes	Glyphorynchus_spirurus	1.14	NA	14.6	0.64232	7.36691e+06	-64.5057	-2.41698
Goura cristata	Columbiformes	Goura_cristata	1.39	NA	2000	5.5	97943.4	132.49	-2.41724
Goura victoria	Columbiformes	Goura_victoria	1.38	NA	2384	5.62548	116545	140.71	-3.29354
Grallaria andicolus	Passeriformes	Grallaria_andicolus	1.28	NA	56.28	NA	141310	-75.0645	-11.1701
Grallaria ruficapilla	Passeriformes	Grallaria_ruficapilla	1.39	NA	82.67	NA	239730	-75.839	2.112
Grallaria squamigera	Passeriformes	Grallaria_squamigera	1.43	NA	136	NA	269140	-75.2956	-5.06837
Grus americana	Gruiformes	Grus_americana	1.53	NA	5825.99	NA	15124.5	-102.16	41.2068
Grus japonensis	Gruiformes	Grus_japonensis	1.43	80	8785.99	20.7	2.23585e+06	124.005	42.7674
Grus monacha	Gruiformes	Grus_monacha	1.48	80	3729.9	NA	1.72844e+06	123.022	53.7214
Grus nigricollis	Gruiformes	Grus_nigricollis	1.6	NA	5999.99	NA	886795	90.135	33.0499
Grus virgo	Gruiformes	Grus_virgo	1.58	NA	2417	10.5983	2.10116e+07	76.5544	38.5766
Guttera pucherani	Galliformes	Guttera_pucherani	1.54	76	1149	4.8073	954048	32.1806	-17.0947
Gymnogyps californianus	Accipitriformes	Gymnogyps_californianus	1.51	80	8442.74	28.231	101767	-117.331	35.9424
Gyps bengalensis	Accipitriformes	Gyps_bengalensis	1.39	NA	4385	NA	3.16574e+06	83.8195	23.9609
Halcyon albiventris	Coraciiformes	Halcyon_albiventris	1.58	NA	65.1	NA	3.76586e+06	29.7843	-14.2716
Haliaeetus leucocephalus	Accipitriformes	Haliaeetus_leucocephalus	1.43	66	4700.58	18.6894	1.49705e+07	-108.718	49.2133
Haplophaedia aureliae	Apodiformes	Haplophaedia_aureliae	1.11	NA	5.2	NA	77844	-76.5969	2.41842
Harpia harpyja	Accipitriformes	Harpia_harpyja	1.58	58	4800	19.425	1.10628e+07	-56.936	-8.04131
Heliangelus micraster	Apodiformes	Heliangelus_micraster	0.97	NA	3.85	NA	17847.9	-79.0246	-4.60736
Heliangelus viola	Apodiformes	Heliangelus_viola	1.13	NA	5.4	NA	35975.5	-78.914	-4.79605
Heliodoxa aurescens	Apodiformes	Heliodoxa_aurescens	1.11	NA	6.4	NA	3.59992e+06	-66.7862	-5.01798
Heliodoxa leadbeateri	Apodiformes	Heliodoxa_leadbeateri	1.19	NA	7.4	NA	409979	-73.4393	-1.60716
Heliodoxa rubinoides	Apodiformes	Heliodoxa_rubinoides	1.19	NA	7.79	NA	203563	-76.0889	-1.84276
Heliomaster longirostris	Apodiformes	Heliomaster_longirostris	1.2	NA	6.6	NA	8.29e+06	-64.8219	-2.36764
Hemitriccus rufigularis	Passeriformes	Hemitriccus_rufigularis	1.45	NA	9.4	NA	91149.8	-72.0559	-11.4298
Hippolais icterina	Passeriformes	Hippolais_icterina	1.29	NA	13.2	0.48692	2.95846e+07	25.0744	22.0181
Hirundo cucullata	Passeriformes	Hirundo_cucullata	1.42	NA	27.1	NA	5.53549e+06	23.5472	-19.3193
Hirundo dimidiata	Passeriformes	Hirundo_dimidiata	1.41	NA	12.1	NA	3.68175e+06	23.278	-17.6835
Hirundo rustica	Passeriformes	Hirundo_rustica	1.31	NA	17.91	0.5698	9.46234e+07	21.295	28.2098
Hirundo semirufa	Passeriformes	Hirundo_semirufa	1.36	NA	30.1	NA	8.91232e+06	17.2659	-3.96381
Hylocharis cyanus	Apodiformes	Hylocharis_cyanus	1.18	NA	3.3	NA	7.03185e+06	-60.141	-5.70769
Hylocichla mustelina	Passeriformes	Hylocichla_mustelina	1.5	NA	50.09	1.295	5.23208e+06	-86.0129	35.2891
Hylophylax naevius	Passeriformes	Hylophylax_naevius	1.44	NA	14.2	0.61124	5.84705e+06	-63.1832	-3.52405
Hypocnemis subflava	Passeriformes	Hypocnemis_subflava	1.32	NA	12.29	NA	362495	-69.4681	-13.0809
Icterus galbula	Passeriformes	Icterus_galbula	1.23	NA	32.83	1.17068	7.87207e+06	-89.6314	34.9531
Icterus graceannae	Passeriformes	Icterus_graceannae	1.3	NA	40.03	NA	77605.8	-80.225	-4.70878
Icterus spurius	Passeriformes	Icterus_spurius	1.27	NA	19.44	0.89096	6.8747e+06	-91.5871	31.2566
Indicator minor	Piciformes	Indicator_minor	1.37	NA	28.2	0.69412	1.31238e+07	20.5366	-2.9499
Indicator variegatus	Piciformes	Indicator_variegatus	2.05	NA	48.76	NA	3.47347e+06	31.4433	-10.5243
Junco hyemalis	Passeriformes	Junco_hyemalis	1.3	NA	19.5	0.85988	1.69371e+07	-105.992	49.0254
Jynx ruficollis	Piciformes	Jynx_ruficollis	1.31	NA	46.4	NA	1.60736e+06	25.8444	-8.48125
Klais guimeti	Apodiformes	Klais_guimeti	1.13	NA	2.6	NA	471297	-76.5882	-0.926501
Knipolegus aterrimus	Passeriformes	Knipolegus_aterrimus	1.21	NA	20.2	NA	592951	-73.0951	-38.8951
Knipolegus poecilocercus	Passeriformes	Knipolegus_poecilocercus	1.21	NA	14.3	NA	1.16703e+06	-63.5445	0.67263
Lafresnaya lafresnayi	Apodiformes	Lafresnaya_lafresnayi	1.24	NA	5.3	NA	312825	-75.9285	-3.11764
Lagonosticta rhodopareia	Passeriformes	Lagonosticta_rhodopareia	1.62	NA	9.3	NA	2.70631e+06	29.95	-13.6846
Lagonosticta senegala	Passeriformes	Lagonosticta_senegala	1.26	NA	9.21	0.40404	1.00484e+07	21.3665	0.389568
Lamprotornis nitens	Passeriformes	Lamprotornis_nitens	1.22	NA	85.59	NA	3.00634e+06	22.446	-22.5334
Laniarius atrococcineus	Passeriformes	Laniarius_atrococcineus	1.29	NA	48.8	NA	1.96285e+06	21.9139	-21.8722
Lanio versicolor	Passeriformes	Lanio_versicolor	1.32	NA	17	NA	2.8287e+06	-63.72	-7.91874
Laniocera hypopyrra	Passeriformes	Laniocera_hypopyrra	1.36	NA	51	NA	6.62952e+06	-62.1852	-3.65837
Lanius collurio	Passeriformes	Lanius_collurio	1.21	NA	28.44	0.99456	2.76042e+07	35.0933	26.5328
Lanius minor	Passeriformes	Lanius_minor	1.27	NA	46.49	NA	1.04972e+07	45.2324	36.084
Larus argentatus	Charadriiformes	Larus_argentatus	1.43	70	1090.99	6.93084	3.2989e+06	10.9068	58.8558
Larus atricilla	Charadriiformes	Larus_atricilla	1.45	NA	307.41	3.22486	4.14245e+06	-86.2297	19.2644
Larus ridibundus	Charadriiformes	Larus_ridibundus	1.82	68	284	3.1598	4.5138e+07	36.9481	47.9824
Lathrotriccus euleri	Passeriformes	Lathrotriccus_euleri	1.28	NA	11.33	NA	1.02709e+07	-55.7621	-12.2614
Lepidocolaptes souleyetii	Passeriformes	Lepidocolaptes_souleyetii	1.26	NA	25.7	1.07744	1.48448e+06	-75.4886	9.28784
Lepidothrix coeruleocapilla	Passeriformes	Lepidothrix_coeruleocapilla	1.25	NA	9.66	NA	140252	-73.4494	-11.5125
Lepidothrix coronata	Passeriformes	Lepidothrix_coronata	1.19	NA	8.34	NA	3.22114e+06	-69.6287	-3.53882
Lepidothrix isidorei	Passeriformes	Lepidothrix_isidorei	1.23	NA	7.8	NA	87387.7	-77.1139	-3.87751
Leptasthenura striata	Passeriformes	Leptasthenura_striata	1.26	NA	8.94	NA	188242	-73.555	-14.3392
Leptasthenura xenothorax	Passeriformes	Leptasthenura_xenothorax	1.3	NA	10.5	NA	2408.57	-72.3363	-13.1988
Leptopogon superciliaris	Passeriformes	Leptopogon_superciliaris	1.2	NA	11.7	NA	473486	-75.4883	1.34649
Leptotila rufaxilla	Columbiformes	Leptotila_rufaxilla	1.41	NA	157	NA	1.16651e+07	-56.8548	-8.96885
Leptotila verreauxi	Columbiformes	Leptotila_verreauxi	1.41	NA	146.88	1.47112	1.5544e+07	-61.6224	-7.54322
Lesbia nuna	Apodiformes	Lesbia_nuna	1.18	NA	3.7	NA	251992	-76.054	-7.35322
Lesbia victoriae	Apodiformes	Lesbia_victoriae	1.12	NA	5	NA	197300	-75.9001	-6.52084
Leucippus taczanowskii	Apodiformes	Leucippus_taczanowskii	1.23	NA	6.4	NA	86672.5	-78.0994	-7.24761
Leucosticte tephrocotis	Passeriformes	Leucosticte_tephrocotis	1.31	NA	37.8	NA	4.20471e+06	-132.047	55.2785
Lipaugus vociferans	Passeriformes	Lipaugus_vociferans	1.3	NA	75.42	1.68868	7.06288e+06	-61.6334	-4.5957
Lonchura striata	Passeriformes	Lonchura_striata	1.42	78	12.3	0.77	5.42967e+06	100.371	19.225
Lophotriccus eulophotes	Passeriformes	Lophotriccus_eulophotes	1.19	NA	6	NA	328684	-69.5944	-9.6089
Lophotriccus pileatus	Passeriformes	Lophotriccus_pileatus	1.13	NA	7.47	NA	475250	-75.5298	-1.50143
Lorius garrulus	Psittaciformes	Lorius_garrulus	1.36	NA	143	5.35612	25448	127.974	0.621614
Lybius torquatus	Piciformes	Lybius_torquatus	1.75	NA	51.7	1.20176	4.66474e+06	28.5777	-14.8312
Macronyx capensis	Passeriformes	Macronyx_capensis	1.31	NA	50.04	NA	815727	27.5067	-27.7794
Malacoptila fulvogularis	Piciformes	Malacoptila_fulvogularis	1.17	NA	57.4	NA	120150	-72.7139	-10.142
Megascops ingens	Strigiformes	Megascops_ingens	1.66	NA	165.32	NA	171202	-73.1042	-8.24892
Megascops koepckeae	Strigiformes	Megascops_koepckeae	1.54	NA	116.93	NA	160297	-75.6386	-10.9159
Melanerpes cruentatus	Piciformes	Melanerpes_cruentatus	1.63	NA	58.1	NA	7.23662e+06	-62.4393	-4.36197
Melanerpes formicivorus	Piciformes	Melanerpes_formicivorus	1.69	NA	79.62	2.06164	1.50308e+06	-104.173	25.7953
Meleagris gallopavo	Galliformes	Meleagris_gallopavo	1.68	NA	5791.37	8.50556	7.37482e+06	-94.8874	37.3061
Melopsittacus undulatus	Psittaciformes	Melopsittacus_undulatus	1.37	62	28.99	1.554	6.18951e+06	132.875	-22.5331
Melospiza georgiana	Passeriformes	Melospiza_georgiana	1.49	NA	16.1	0.83916	1.01035e+07	-94.173	45.4441
Melospiza melodia	Passeriformes	Melospiza_melodia	1.43	NA	21.91	0.99	1.30043e+07	-102.963	45.5288
Mergus merganser	Anseriformes	Mergus_merganser	2	NA	1451.02	5.03496	3.44611e+07	22.3741	50.9309
Merops apiaster	Coraciiformes	Merops_apiaster	1.32	NA	56.6	0.91168	1.32356e+07	41.7665	33.2175
Merops bullockoides	Coraciiformes	Merops_bullockoides	1.37	NA	34.8	NA	5.31328e+06	25.7911	-13.5073
Metallura phoebe	Apodiformes	Metallura_phoebe	1.01	NA	5.4	NA	142015	-74.9521	-12.5911
Metallura tyrianthina	Apodiformes	Metallura_tyrianthina	1.18	NA	3.8	NA	422618	-74.3402	-5.14985
Micrastur ruficollis	Falconiformes	Micrastur_ruficollis	1.57	NA	177.64	NA	1.24859e+07	-58.8871	-7.38743
Microrhopias quixensis	Passeriformes	Microrhopias_quixensis	1.37	NA	7.9	NA	4.10394e+06	-66.3149	-3.59448
Milvus migrans	Accipitriformes	Milvus_migrans	1.63	NA	734.1	6.02952	6.41623e+07	65.7956	25.5367
Milvus milvus	Accipitriformes	Milvus_milvus	1.5	NA	1071.77	8	3.58721e+06	13.8632	47.3926
Mimus longicaudatus	Passeriformes	Mimus_longicaudatus	1.32	NA	66.6	NA	182109	-78.2692	-8.11309
Mimus polyglottos	Passeriformes	Mimus_polyglottos	1.22	NA	48.5	1.43979	1.03132e+07	-98.8627	37.6067
Mionectes macconnelli	Passeriformes	Mionectes_macconnelli	1.21	NA	13.5	NA	2.58283e+06	-57.8858	-2.52575
Mionectes oleagineus	Passeriformes	Mionectes_oleagineus	1.13	NA	11.17	0.4662	8.94691e+06	-64.2726	-2.30296
Mionectes olivaceus	Passeriformes	Mionectes_olivaceus	1.3	NA	15.31	NA	39755.1	-83.2947	9.37797
Mionectes striaticollis	Passeriformes	Mionectes_striaticollis	1.33	NA	15	NA	317904	-74.7228	-6.35781
Mirafra sabota	Passeriformes	Mirafra_sabota	1.25	NA	24.7	NA	2.58894e+06	22.8544	-23.7237
Mniotilta varia	Passeriformes	Mniotilta_varia	1.29	NA	10.9	0.45584	1.21108e+07	-94.0334	38.6938
Molothrus ater	Passeriformes	Molothrus_ater	1.41	NA	40.26	1.1914	1.24323e+07	-102.352	41.9687
Molothrus bonariensis	Passeriformes	Molothrus_bonariensis	1.51	NA	41.49	1.28	1.32101e+07	-59.1409	-13.4119
Momotus momota	Coraciiformes	Momotus_momota	1.52	NA	114.96	2.26884	8.09593e+06	-60.7967	-6.18107
Monasa morphoeus	Piciformes	Monasa_morphoeus	1.24	NA	87.9	NA	5.20863e+06	-64.1462	-5.83668
Monticola brevipes	Passeriformes	Monticola_brevipes	1.39	NA	33	NA	1.0437e+06	19.9815	-24.4708
Motacilla capensis	Passeriformes	Motacilla_capensis	1.05	NA	20.8	NA	3.89206e+06	23.4293	-20.2028
Muscicapa striata	Passeriformes	Muscicapa_striata	1.46	NA	15.9	0.50764	3.75045e+07	36.252	28.8635
Muscigralla brevicauda	Passeriformes	Muscigralla_brevicauda	1.22	NA	12.6	NA	168075	-77.5337	-9.20338
Muscisaxicola fluviatilis	Passeriformes	Muscisaxicola_fluviatilis	1.22	NA	14.7	NA	1.23394e+06	-67.8234	-10.7114
Myiarchus crinitus	Passeriformes	Myiarchus_crinitus	1.32	NA	32.1	NA	7.01167e+06	-88.0435	36.2585
Myiarchus tuberculifer	Passeriformes	Myiarchus_tuberculifer	1.23	NA	17.7	0.68376	1.05885e+07	-68.0369	-0.582654
Myiobius villosus	Passeriformes	Myiobius_villosus	1.2	NA	14.1	NA	270857	-75.1235	-5.01382
Myioborus melanocephalus	Passeriformes	Myioborus_melanocephalus	1.38	NA	11.3	NA	185465	-74.5593	-8.67145
Myioborus miniatus	Passeriformes	Myioborus_miniatus	1.39	NA	9	NA	1.25399e+06	-85.3613	9.52509
Myiodynastes bairdii	Passeriformes	Myiodynastes_bairdii	1.28	NA	45	NA	96586.4	-80.0631	-4.65261
Myiodynastes maculatus	Passeriformes	Myiodynastes_maculatus	1.31	NA	43.2	1.17068	4.78636e+06	-68.0975	3.99952
Myiophobus fasciatus	Passeriformes	Myiophobus_fasciatus	1.27	NA	9.9	0.38332	1.00177e+07	-56.049	-14.7217
Myiozetetes similis	Passeriformes	Myiozetetes_similis	1.33	NA	28	0.84952	1.02436e+07	-61.8517	-4.76081
Myrmecocichla formicivora	Passeriformes	Myrmecocichla_formicivora	1.2	NA	41.6	NA	2.08033e+06	22.6662	-25.6523
Myrmia micrura	Apodiformes	Myrmia_micrura	1.29	NA	2.21	NA	72199	-80.2354	-4.71675
Myrmoborus leucophrys	Passeriformes	Myrmoborus_leucophrys	1.47	NA	21.5	NA	5.11201e+06	-62.4567	-4.88449
Myrmotherula longicauda	Passeriformes	Myrmotherula_longicauda	1.36	NA	8.3	NA	153809	-73.6895	-8.69181
Myrmotherula longipennis	Passeriformes	Myrmotherula_longipennis	1.32	NA	9.4	NA	5.11494e+06	-62.605	-2.48192
Myrmotherula schisticolor	Passeriformes	Myrmotherula_schisticolor	1.29	NA	9.6	NA	534165	-77.9899	4.75234
Myrtis fanny	Apodiformes	Myrtis_fanny	1.3	NA	2.3	NA	256517	-76.501	-10.15
Neomorphus geoffroyi	Cuculiformes	Neomorphus_geoffroyi	1.51	NA	355.03	NA	2.91743e+06	-59.6531	-7.17147
Neophron percnopterus	Accipitriformes	Neophron_percnopterus	1.58	NA	2082	11	2.52807e+07	31.5837	24.0681
Netta rufina	Anseriformes	Netta_rufina	1.38	NA	1118	5.55296	8.94715e+06	69.9469	41.3876
Nilaus afer	Passeriformes	Nilaus_afer	1.18	NA	19.06	NA	1.05556e+07	22.1206	-2.91095
Nonnula ruficapilla	Piciformes	Nonnula_ruficapilla	1.11	NA	22	NA	2.84582e+06	-62.1195	-8.56449
Numida meleagris	Galliformes	Numida_meleagris	1.24	NA	1299	4.22688	1.35981e+07	23.9939	-4.86861
Nycticorax nycticorax	Pelecaniformes	Nycticorax_nycticorax	1.35	NA	810	6.89976	5.28834e+07	-5.84094	11.7047
Nyctiphrynus ocellatus	Caprimulgiformes	Nyctiphrynus_ocellatus	1.47	NA	39.6	0.76664	3.39843e+06	-56.4165	-12.907
Nymphicus hollandicus	Psittaciformes	Nymphicus_hollandicus	1.28	72	94.61	2.47604	6.46107e+06	134.603	-25.2182
Nystalus chacuru	Piciformes	Nystalus_chacuru	1.26	NA	52.3	NA	4.3292e+06	-50.5846	-16.1954
Ochthoeca fumicolor	Passeriformes	Ochthoeca_fumicolor	1.29	NA	16.6	NA	246138	-74.8124	-3.69903
Ochthoeca oenanthoides	Passeriformes	Ochthoeca_oenanthoides	1.29	NA	17.7	NA	622991	-69.3225	-17.7873
Ochthoeca piurae	Passeriformes	Ochthoeca_piurae	1.32	NA	12.56	NA	20105.8	-78.5371	-7.81161
Ocreatus underwoodii	Apodiformes	Ocreatus_underwoodii	1.01	NA	3	NA	385745	-74.1097	-2.6561
Onychorhynchus coronatus	Passeriformes	Onychorhynchus_coronatus	1.14	NA	14	0.48692	5.97146e+06	-63.0686	-3.26796
Oreotrochilus estella	Apodiformes	Oreotrochilus_estella	1.02	NA	8.1	NA	595801	-68.2877	-19.0327
Oreotrochilus melanogaster	Apodiformes	Oreotrochilus_melanogaster	1.04	NA	9.1	NA	55336.7	-75.5668	-11.8787
Oriolus chinensis	Passeriformes	Oriolus_chinensis	1.43	NA	82.6	NA	8.17007e+06	109.945	25.8493
Ortygospiza atricollis	Passeriformes	Ortygospiza_atricollis	1.37	NA	10.6	NA	3.23174e+06	22.962	-9.903
Otus scops	Strigiformes	Otus_scops	1.4	78	92	2.57964	2.61913e+07	26.8688	28.8109
Pachyramphus polychopterus	Passeriformes	Pachyramphus_polychopterus	1.26	NA	20.8	0.76664	1.39321e+07	-58.2937	-9.70545
Pachyramphus versicolor	Passeriformes	Pachyramphus_versicolor	1.29	NA	15.5	NA	302227	-75.571	-1.66424
Pachyramphus viridis	Passeriformes	Pachyramphus_viridis	1.3	NA	21	NA	4.95909e+06	-49.7629	-18.2329
Parula pitiayumi	Passeriformes	Parula_pitiayumi	1.43	NA	6.82	NA	8.36492e+06	-57.8856	-12.551
Parus major	Passeriformes	Parus_major	1.51	80	16.25	0.857317	3.25783e+07	69.6393	45.2705
Passer diffusus	Passeriformes	Passer_diffusus	1.31	NA	24.2	NA	3.36522e+06	26.0388	-21.7475
Passer domesticus	Passeriformes	Passer_domesticus	1.57	NA	26.51	1.00492	6.4173e+07	14.9372	31.8794
Passer melanurus	Passeriformes	Passer_melanurus	1.31	NA	29.5	NA	1.76537e+06	22.7161	-27.2796
Passer montanus	Passeriformes	Passer_montanus	1.09	78	21.39	0.755429	3.93038e+07	82.7806	46.4633
Passerculus sandwichensis	Passeriformes	Passerculus_sandwichensis	1.15	NA	19.97	0.70448	1.99166e+07	-106.65	49.7067
Passerina amoena	Passeriformes	Passerina_amoena	1.39	NA	15.49	NA	4.66771e+06	-110.745	38.1705
Passerina cyanea	Passeriformes	Passerina_cyanea	1.3	NA	14.69	0.6734	7.43358e+06	-91.6212	35.2653
Patagioenas fasciata	Columbiformes	Patagioenas_fasciata	1.49	NA	366.3	NA	2.56918e+06	-110.144	32.6375
Patagona gigas	Apodiformes	Patagona_gigas	1.08	NA	20.2	NA	1.26928e+06	-69.9808	-21.6985
Pavo muticus	Galliformes	Pavo_muticus	1.34	NA	2205.71	6.5	1.12791e+06	101.035	16.2299
Pelecanus occidentalis	Pelecaniformes	Pelecanus_occidentalis	1.38	NA	3427.84	21.5	7.59691e+06	-81.3554	18.8022
Pelecanus onocrotalus	Pelecaniformes	Pelecanus_onocrotalus	1.25	66	9322.31	33	1.62365e+07	27.6403	5.0046
Pernis apivorus	Accipitriformes	Pernis_apivorus	1.53	66	754.37	7.2	3.54023e+07	30.6671	29.3547
Phaeomyias murina	Passeriformes	Phaeomyias_murina	1.29	NA	10	0.38332	1.08158e+07	-57.0429	-7.99995
Phaethornis guy	Apodiformes	Phaethornis_guy	1.22	NA	6.3	NA	555604	-75.2424	-2.34246
Phaethornis hispidus	Apodiformes	Phaethornis_hispidus	1.02	NA	5	NA	4.00829e+06	-67.3575	-5.41027
Phaethornis malaris	Apodiformes	Phaethornis_malaris	1.07	NA	5.9	NA	3.78981e+06	-65.1651	-5.48602
Phaethornis philippii	Apodiformes	Phaethornis_philippii	1.17	NA	5	NA	1.59641e+06	-66.2975	-7.4622
Phaethornis ruber	Apodiformes	Phaethornis_ruber	1.13	NA	2.4	NA	9.72708e+06	-56.378	-7.16458
Phaethornis stuarti	Apodiformes	Phaethornis_stuarti	1.17	NA	2.9	NA	147917	-70.029	-13.8873
Phainopepla nitens	Passeriformes	Phainopepla_nitens	1.83	NA	22.1	0.81844	1.4233e+06	-108.721	28.6075
Phasianus colchicus	Galliformes	Phasianus_colchicus	1.27	82	1120.31	3.99896	1.6756e+07	21.4771	42.7598
Pheucticus aureoventris	Passeriformes	Pheucticus_aureoventris	1.5	NA	49	1.47	1.91937e+06	-63.4817	-17.8592
Pheucticus chrysogaster	Passeriformes	Pheucticus_chrysogaster	1.45	NA	55.8	NA	537508	-76.4341	-8.34649
Pheucticus ludovicianus	Passeriformes	Pheucticus_ludovicianus	1.33	NA	42	1.36752	9.30076e+06	-93.9897	37.7035
Philetairus socius	Passeriformes	Philetairus_socius	1.48	NA	27.4	NA	658339	19.4959	-25.4325
Philydor erythrocercum	Passeriformes	Philydor_erythrocercum	1.21	NA	25.27	NA	5.41696e+06	-61.8401	-5.59223
Phlogophilus harterti	Apodiformes	Phlogophilus_harterti	1.2	NA	2.7	NA	33304	-72.3881	-12.018
Phoenicopterus ruber	Phoenicopteriformes	Phoenicopterus_ruber	1.52	NA	3031.59	11.1888	288741	-76.2688	18.5187
Phoeniculus purpureus	Bucerotiformes	Phoeniculus_purpureus	1.32	NA	73.21	2.0202	1.22823e+07	20.5956	-2.75101
Phrygilus punensis	Passeriformes	Phrygilus_punensis	1.36	NA	37.2	0.95	309258	-73.8959	-12.5407
Phyllomyias uropygialis	Passeriformes	Phyllomyias_uropygialis	1.33	NA	8.99	NA	232341	-72.4372	-8.97583
Phylloscopus collybita	Passeriformes	Phylloscopus_collybita	1.47	NA	8.3	0.32	2.17969e+07	21.8068	35.9497
Phylloscopus trochilus	Passeriformes	Phylloscopus_trochilus	1.32	NA	8.7	0.35	5.97769e+07	49.7139	35.9187
Pica pica	Passeriformes	Pica_pica	1.25	76	217.48	4.83812	3.18707e+07	71.9798	48.9364
Picumnus subtilis	Piciformes	Picumnus_subtilis	1.59	NA	10.4	NA	39543.1	-71.7126	-12.5502
Pionites leucogaster	Psittaciformes	Pionites_leucogaster	1.38	NA	155	5.3872	1.98116e+06	-54.9091	-7.58816
Pionites melanocephalus	Psittaciformes	Pionites_melanocephalus	1.27	NA	148.78	5.36648	2.91986e+06	-64.3049	1.3062
Pionus fuscus	Psittaciformes	Pionus_fuscus	1.63	NA	206	NA	1.86476e+06	-55.7243	1.0335
Pionus senilis	Psittaciformes	Pionus_senilis	1.29	NA	212	6.216	458152	-90.1211	16.385
Pipilo erythrophthalmus	Passeriformes	Pipilo_erythrophthalmus	1.32	NA	40.03	1.40896	3.45089e+06	-86.2305	38.5131
Pipreola frontalis	Passeriformes	Pipreola_frontalis	1.37	NA	42.4	NA	113699	-71.4984	-13.1665
Piprites chloris	Passeriformes	Piprites_chloris	1.22	NA	16	NA	7.07284e+06	-62.4822	-4.82613
Piranga olivacea	Passeriformes	Piranga_olivacea	1.27	NA	28.2	NA	6.57634e+06	-82.5708	25.6207
Platalea leucorodia	Pelecaniformes	Platalea_leucorodia	1.25	68	1868	NA	9.19947e+06	82.8813	36.632
Platyrinchus flavigularis	Passeriformes	Platyrinchus_flavigularis	1.14	NA	10	NA	114125	-76.0014	-3.97288
Platyrinchus platyrhynchos	Passeriformes	Platyrinchus_platyrhynchos	1.13	NA	12	NA	5.52699e+06	-62.5427	-3.2777
Plocepasser mahali	Passeriformes	Plocepasser_mahali	1.31	NA	41.47	1.27428	3.09894e+06	27.0431	-16.1581
Ploceus capensis	Passeriformes	Ploceus_capensis	1.16	NA	43.99	NA	666192	25.9853	-29.7529
Podiceps auritus	Podicipediformes	Podiceps_auritus	1.52	80	453	2.51748	2.37094e+07	-1.45987	53.3066
Poicephalus cryptoxanthus	Psittaciformes	Poicephalus_cryptoxanthus	1.41	NA	140	4.8174	1.18266e+06	35.8869	-15.6998
Poicephalus gulielmi	Psittaciformes	Poicephalus_gulielmi	1.32	NA	274.59	6.0088	1.48392e+06	17.5477	0.829894
Poicephalus meyeri	Psittaciformes	Poicephalus_meyeri	1.26	NA	117.47	4.56876	5.83605e+06	26.9874	-5.7682
Poicephalus robustus	Psittaciformes	Poicephalus_robustus	1.27	NA	343.01	8.50556	95222.4	28.7016	-30.9674
Poicephalus senegalus	Psittaciformes	Poicephalus_senegalus	1.37	NA	147	4.87956	2.71482e+06	-0.670852	11.055
Polioptila caerulea	Passeriformes	Polioptila_caerulea	1.38	NA	5.8	0.3108	7.26356e+06	-96.1065	32.8286
Polioptila plumbea	Passeriformes	Polioptila_plumbea	1.25	NA	6	NA	7.56203e+06	-60.6727	-1.41485
Polioxolmis rufipennis	Passeriformes	Polioxolmis_rufipennis	1.24	NA	34.5	NA	402084	-71.3252	-14.8586
Polyonymus caroli	Apodiformes	Polyonymus_caroli	1.15	NA	4.8	NA	159556	-75.6556	-12.0383
Polytelis swainsonii	Psittaciformes	Polytelis_swainsonii	1.84	NA	153	3.4706	66733.8	150.801	-28.9666
Poospiza rubecula	Passeriformes	Poospiza_rubecula	1.35	NA	32.16	NA	17643	-77.3257	-9.77717
Primolius auricollis	Psittaciformes	Primolius_auricollis	1.4	NA	245	7.80108	838422	-60.2068	-16.3105
Primolius maracana	Psittaciformes	Primolius_maracana	1.34	NA	256	7.49028	3.45857e+06	-48.5778	-15.2356
Prinia flavicans	Passeriformes	Prinia_flavicans	1.27	NA	8.73	NA	2.71729e+06	21.5592	-22.7213
Prinia maculosa	Passeriformes	Prinia_maculosa	1.04	NA	9	NA	581626	22.9881	-31.3784
Probosciger aterrimus	Psittaciformes	Probosciger_aterrimus	1.64	NA	841	21.238	716102	140.665	-5.87909
Progne subis	Passeriformes	Progne_subis	1.46	NA	53.79	1.06708	2.08362e+07	-75.0405	9.72174
Prunella modularis	Passeriformes	Prunella_modularis	1.47	NA	20.24	0.80808	9.56083e+06	29.6924	50.7003
Psarocolius angustifrons	Passeriformes	Psarocolius_angustifrons	1.35	NA	271.5	NA	2.22424e+06	-71.3652	-4.7107
Pseudotriccus ruficeps	Passeriformes	Pseudotriccus_ruficeps	1.22	NA	11.3	NA	194097	-74.5366	-6.31426
Psilopogon pyrolophus	Piciformes	Psilopogon_pyrolophus	1.69	NA	129	2.28956	474762	101.33	0.700023
Psittacula derbiana	Psittaciformes	Psittacula_derbiana	1.28	NA	251	6.3196	333178	97.9912	28.0382
Psittacula eupatria	Psittaciformes	Psittacula_eupatria	1.21	NA	214	5.73944	3.22703e+06	87.0173	21.9119
Psittacula krameri	Psittaciformes	Psittacula_krameri	1.37	68	116.11	4.0404	8.37248e+06	45.7502	17.3823
Psittaculirostris edwardsii	Psittaciformes	Psittaculirostris_edwardsii	1.52	NA	105	3.367	99165.3	143.566	-4.43915
Psittacus erithacus	Psittaciformes	Psittacus_erithacus	1.4	62	333	9.51048	2.73275e+06	18.6704	0.0382192
Pteroglossus azara	Piciformes	Pteroglossus_azara	1.49	NA	144.45	NA	3.11802e+06	-69.0949	-3.12914
Pteroglossus inscriptus	Piciformes	Pteroglossus_inscriptus	1.56	NA	125.82	2.59	2.97822e+06	-54.6724	-8.64361
Pterophanes cyanopterus	Apodiformes	Pterophanes_cyanopterus	1.08	NA	9.25	NA	232587	-74.941	-5.39706
Ptilinopus perlatus	Columbiformes	Ptilinopus_perlatus	1.48	NA	210	NA	673228	140.521	-5.36201
Ptilinopus pulchellus	Columbiformes	Ptilinopus_pulchellus	1.47	NA	70	1.02564	339396	140.481	-4.55884
Ptilinopus regina	Columbiformes	Ptilinopus_regina	1.37	NA	101.57	1.25356	554349	141.097	-18.2901
Pulsatrix perspicillata	Strigiformes	Pulsatrix_perspicillata	1.8	76	983.55	10.9816	1.26792e+07	-58.8286	-6.76838
Pycnonotus nigricans	Passeriformes	Pycnonotus_nigricans	1.21	NA	30.8	NA	2.06576e+06	21.3023	-23.6767
Pygochelidon cyanoleuca	Passeriformes	Pygochelidon_cyanoleuca	1.45	NA	9.7	0.44548	1.03693e+07	-59.3562	-21.2015
Pyriglena leuconota	Passeriformes	Pyriglena_leuconota	1.38	NA	32.3	0.96348	1.9837e+06	-55.7779	-9.68914
Pyrrhura lepida	Psittaciformes	Pyrrhura_lepida	1.29	NA	75	3.0044	548365	-48.9385	-3.89535
Pyrrhura leucotis	Psittaciformes	Pyrrhura_leucotis	1.26	NA	75.87	NA	273312	-41.5424	-19.0536
Pyrrhura molinae	Psittaciformes	Pyrrhura_molinae	1.36	NA	77.09	NA	675403	-61.8882	-17.5905
Pyrrhura picta	Psittaciformes	Pyrrhura_picta	1.38	NA	62.1	2.5382	1.47212e+06	-58.8698	3.05669
Pyrrhura rhodocephala	Psittaciformes	Pyrrhura_rhodocephala	1.39	NA	75.87	NA	11585.4	-71.0694	8.70266
Pytilia melba	Passeriformes	Pytilia_melba	1.42	NA	15.4	0.59052	6.0334e+06	26.6373	-4.58446
Quelea quelea	Passeriformes	Quelea_quelea	1.25	NA	18.59	NA	1.06222e+07	24.6954	-6.04491
Querula purpurata	Passeriformes	Querula_purpurata	1.63	NA	107.35	2.20668	5.63483e+06	-63.0513	-4.23719
Quiscalus quiscula	Passeriformes	Quiscalus_quiscula	1.32	NA	105.18	2.68324	8.47564e+06	-94.6164	44.5269
Rallus aquaticus	Gruiformes	Rallus_aquaticus	1.25	NA	110.67	1.79228	1.3652e+07	49.5385	46.1938
Ramphastos toco	Piciformes	Ramphastos_toco	1.8	106	617.99	6.36909	4.57298e+06	-53.4641	-17.4871
Ramphastos tucanus	Piciformes	Ramphastos_tucanus	1.57	NA	659.58	6.19528	2.36444e+06	-55.6945	0.456257
Ramphocelus carbo	Passeriformes	Ramphocelus_carbo	1.38	NA	25.92	1.17068	1.04986e+07	-58.5984	-6.97611
Recurvirostra avosetta	Charadriiformes	Recurvirostra_avosetta	1.59	NA	304	1.89588	2.33322e+07	56.9703	24.2004
Regulus calendula	Passeriformes	Regulus_calendula	1.35	NA	6.19	0.32116	1.38812e+07	-106.05	48.6951
Rhegmatorhina melanosticta	Passeriformes	Rhegmatorhina_melanosticta	1.33	NA	30.99	NA	1.90961e+06	-70.5283	-6.35758
Rhinopomastus cyanomelas	Bucerotiformes	Rhinopomastus_cyanomelas	1.13	NA	27.11	1.0878	6.39772e+06	27.9286	-15.87
Rhodopis vesper	Apodiformes	Rhodopis_vesper	1.19	NA	3.8	NA	306177	-73.0177	-18.0952
Riparia riparia	Passeriformes	Riparia_riparia	1.45	NA	12.68	0.42476	7.17749e+07	4.85699	34.8819
Rostrhamus sociabilis	Accipitriformes	Rostrhamus_sociabilis	1.41	NA	366.94	5.27324	1.16021e+07	-57.721	-11.5556
Sakesphorus bernardi	Passeriformes	Sakesphorus_bernardi	1.46	NA	34.4	NA	102453	-80.0645	-4.63725
Saltator maximus	Passeriformes	Saltator_maximus	1.4	NA	47.62	1.44004	9.54399e+06	-62.1308	-3.82149
Sayornis nigricans	Passeriformes	Sayornis_nigricans	1.26	NA	18.63	0.50764	2.67349e+06	-93.6999	15.8137
Sayornis phoebe	Passeriformes	Sayornis_phoebe	1.45	NA	19.7	0.61124	7.96e+06	-96.563	43.8556
Schiffornis turdina	Passeriformes	Schiffornis_turdina	1.31	NA	31.7	1.10852	5.58728e+06	-62.1575	-6.4923
Schistes geoffroyi	Apodiformes	Schistes_geoffroyi	1.29	NA	3.6	NA	546184	-73.5279	-4.42027
Schistochlamys melanopis	Passeriformes	Schistochlamys_melanopis	1.36	NA	33	1.26392	6.47211e+06	-57.3492	-7.32572
Sclerurus caudacutus	Passeriformes	Sclerurus_caudacutus	1.35	NA	36.23	NA	5.50812e+06	-62.6297	-2.91121
Sclerurus mexicanus	Passeriformes	Sclerurus_mexicanus	1.27	NA	25.1	0.81844	6.36228e+06	-62.3888	-3.50939
Scopus umbretta	Pelecaniformes	Scopus_umbretta	1.35	NA	472	4.403	1.98831e+07	22.9033	-2.89075
Seiurus aurocapilla	Passeriformes	Seiurus_aurocapilla	1.36	NA	18.8	0.7252	8.87745e+06	-91.9878	40.1492
Selasphorus platycercus	Apodiformes	Selasphorus_platycercus	1.09	NA	3.54	NA	696974	-107.317	32.3865
Selasphorus rufus	Apodiformes	Selasphorus_rufus	1.15	NA	3.5	0.16576	2.81764e+06	-115.908	41.2561
Selenidera reinwardtii	Piciformes	Selenidera_reinwardtii	1.56	NA	161.77	NA	512972	-75.0523	-1.79531
Serinus canaria	Passeriformes	Serinus_canaria	1.62	80	24.3	0.57	19528.3	-40.3726	25.4978
Setophaga ruticilla	Passeriformes	Setophaga_ruticilla	1.31	NA	8.24	0.37296	1.51245e+07	-95.1192	36.2243
Sialia sialis	Passeriformes	Sialia_sialis	1.45	NA	27.5	1.02564	5.89564e+06	-89.9125	37.5638
Sicalis luteola	Passeriformes	Sicalis_luteola	1.3	NA	15.9	NA	6.59901e+06	-58.3972	-21.752
Sicalis olivascens	Passeriformes	Sicalis_olivascens	1.32	NA	21.8	0.63	770048	-69.4871	-20.0973
Sitta canadensis	Passeriformes	Sitta_canadensis	1.22	NA	9.8	0.59052	1.22714e+07	-101.891	45.8296
Snowornis cryptolophus	Passeriformes	Snowornis_cryptolophus	1.42	NA	73.6	NA	109525	-76.8912	-4.15662
Snowornis subalaris	Passeriformes	Snowornis_subalaris	1.27	NA	81.2	NA	59748.2	-76.3782	-5.72853
Spheniscus demersus	Sphenisciformes	Spheniscus_demersus	1.63	74	3130.11	13.8	330032	21.4579	-31.4422
Spizella passerina	Passeriformes	Spizella_passerina	1.29	NA	12.2	NA	1.49897e+07	-104.267	45.3963
Spizella pusilla	Passeriformes	Spizella_pusilla	1.28	NA	12.5	NA	4.74513e+06	-90.8215	37.9677
Sporophila caerulescens	Passeriformes	Sporophila_caerulescens	1.22	NA	9.73	0.45	7.99095e+06	-58.13	-19.3346
Sporophila nigricollis	Passeriformes	Sporophila_nigricollis	1.32	NA	9.6	0.532	7.19394e+06	-54.8823	-6.92439
Sporophila peruviana	Passeriformes	Sporophila_peruviana	1.28	NA	12.6	NA	102709	-79.6504	-5.75431
Sporopipes squamifrons	Passeriformes	Sporopipes_squamifrons	1.38	NA	12.3	NA	1.94552e+06	22.1462	-23.247
Stelgidopteryx serripennis	Passeriformes	Stelgidopteryx_serripennis	1.36	NA	15.69	NA	1.1523e+07	-100.14	37.4907
Stenostira scita	Passeriformes	Stenostira_scita	1.23	NA	5.9	NA	1.11695e+06	24.3973	-25.6631
Sterna caspia	Charadriiformes	Sterna_caspia	1.39	NA	655	4.85884	1.39299e+07	26.1455	16.972
Sterna sandvicensis	Charadriiformes	Sterna_sandvicensis	1.4	NA	199.83	2.58832	8.10641e+06	-35.4798	9.43547
Streptocitta albicollis	Passeriformes	Streptocitta_albicollis	1.58	NA	248	NA	55722.2	121.427	-4.09151
Streptopelia capicola	Columbiformes	Streptopelia_capicola	1.41	NA	142	1.54364	9.53463e+06	28.6478	-12.7388
Streptopelia turtur	Columbiformes	Streptopelia_turtur	1.23	72	132	1.44004	2.20896e+07	38.3464	40.5218
Strigops habroptila	Psittaciformes	Strigops_habroptila	1.31	NA	1732.05	17.094	57.2518	170.889	-41.5526
Strix aluco	Strigiformes	Strix_aluco	1.59	82	472.46	9.15686	9.59387e+06	31.324	49.5089
Strix nebulosa	Strigiformes	Strix_nebulosa	1.65	82	1061.89	15.1878	1.98467e+07	42.2432	58.8094
Struthio camelus	Struthioniformes	Struthio_camelus	2.16	80	111000	41.9191	9.26804e+06	20.1195	-0.031213
Sturnella magna	Passeriformes	Sturnella_magna	1.48	78	91.76	2.3	7.03025e+06	-84.5171	30.4388
Sturnus vulgaris	Passeriformes	Sturnus_vulgaris	1.32	NA	77.14	2.04092	4.03885e+07	-4.67789	43.065
Sylvia atricapilla	Passeriformes	Sylvia_atricapilla	1.09	74	16.7	0.6734	2.13793e+07	17.3047	35.9719
Sylvia communis	Passeriformes	Sylvia_communis	1.3	NA	15.1	0.534	3.35206e+07	31.1884	33.0199
Sylvietta rufescens	Passeriformes	Sylvietta_rufescens	1.31	NA	11.6	NA	4.18731e+06	24.8772	-20.8576
Synallaxis gujanensis	Passeriformes	Synallaxis_gujanensis	1.35	NA	18.1	NA	4.46269e+06	-61.8816	-5.62988
Synallaxis rutilans	Passeriformes	Synallaxis_rutilans	1.42	NA	16.7	NA	5.85576e+06	-63.0876	-3.71241
Synallaxis stictothorax	Passeriformes	Synallaxis_stictothorax	1.31	NA	10.2	NA	49697.2	-80.3917	-4.82658
Syndactyla rufosuperciliata	Passeriformes	Syndactyla_rufosuperciliata	1.29	NA	25.6	NA	1.72745e+06	-56.2014	-25.9513
Tachybaptus ruficollis	Podicipediformes	Tachybaptus_ruficollis	1.59	NA	169.43	1.7225	3.72393e+07	50.1042	19.2923
Tachycineta bicolor	Passeriformes	Tachycineta_bicolor	1.35	NA	21.2	0.5698	1.74916e+07	-105.979	46.732
Tachyphonus rufus	Passeriformes	Tachyphonus_rufus	1.38	NA	34.4	1.2	5.94133e+06	-53.4011	-9.22045
Taeniopygia guttata	Passeriformes	Taeniopygia_guttata	1.25	80	12.04	0.45584	83399.8	121.922	-8.98406
Tangara cyanicollis	Passeriformes	Tangara_cyanicollis	1.31	NA	17	0.66304	1.24835e+06	-61.7854	-7.99062
Tangara mexicana	Passeriformes	Tangara_mexicana	1.29	NA	20.5	NA	7.03972e+06	-62.3596	-4.67445
Tangara vassorii	Passeriformes	Tangara_vassorii	1.38	NA	18	NA	206740	-76.4801	0.904122
Taphrospilus hypostictus	Apodiformes	Taphrospilus_hypostictus	1.16	NA	7	NA	110344	-71.8692	-10.6016
Tchagra australis	Passeriformes	Tchagra_australis	1.2	NA	32.3	1.27428	8.30636e+06	22.2796	-9.97408
Thalurania furcata	Apodiformes	Thalurania_furcata	0.99	NA	4.19	0.2072	1.12251e+07	-58.183	-8.85026
Thamnistes anabatinus	Passeriformes	Thamnistes_anabatinus	1.3	NA	20.7	NA	397615	-84.6104	11.5156
Thamnophilus aethiops	Passeriformes	Thamnophilus_aethiops	1.34	NA	25.7	NA	4.94623e+06	-62.9142	-5.64516
Thamnophilus doliatus	Passeriformes	Thamnophilus_doliatus	1.46	NA	27.03	NA	1.07252e+07	-59.9449	-6.5863
Thamnophilus murinus	Passeriformes	Thamnophilus_murinus	1.45	NA	19.3	NA	4.1977e+06	-65.2148	-1.88078
Thamnophilus palliatus	Passeriformes	Thamnophilus_palliatus	1.45	NA	23.3	NA	2.54221e+06	-56.3088	-10.6716
Thaumastura cora	Apodiformes	Thaumastura_cora	1.15	NA	1.9	NA	172363	-75.9876	-11.9918
Thlypopsis ornata	Passeriformes	Thlypopsis_ornata	1.34	NA	12	NA	180800	-77.5791	-6.47938
Thlypopsis ruficeps	Passeriformes	Thlypopsis_ruficeps	1.4	NA	11	NA	214122	-67.4491	-18.0591
Threnetes leucurus	Apodiformes	Threnetes_leucurus	1.15	NA	5.6	NA	5.23642e+06	-64.6991	-3.31215
Threskiornis aethiopicus	Pelecaniformes	Threskiornis_aethiopicus	1.25	68	1493.18	9	1.77352e+07	23.678	-1.17408
Thryothorus eisenmanni	Passeriformes	Thryothorus_eisenmanni	1.25	NA	23.1	NA	17967.7	-73.0644	-12.8485
Thryothorus superciliaris	Passeriformes	Thryothorus_superciliaris	1.3	NA	22.8	NA	96984.4	-80.1099	-4.27625
Tolmomyias poliocephalus	Passeriformes	Tolmomyias_poliocephalus	1.17	NA	10.8	NA	6.11244e+06	-62.4582	-3.35017
Toxostoma rufum	Passeriformes	Toxostoma_rufum	1.23	NA	68.8	2.072	5.85909e+06	-93.1335	41.4001
Trachyphonus vaillantii	Piciformes	Trachyphonus_vaillantii	1.68	NA	69.4	NA	3.12087e+06	28.5466	-14.5158
Trichoglossus haematodus	Psittaciformes	Trichoglossus_haematodus	1.33	NA	113.25	3.79176	876911	142.459	-5.84599
Tricholaema leucomelas	Piciformes	Tricholaema_leucomelas	1.58	NA	32.2	1.01528	3.12344e+06	22.7614	-24.0778
Troglodytes aedon	Passeriformes	Troglodytes_aedon	1.34	NA	10.85	0.54908	2.5489e+07	-77.8989	7.80055
Troglodytes troglodytes	Passeriformes	Troglodytes_troglodytes	1.32	NA	9.74	0.495714	1.81444e+07	64.2283	46.1787
Trogon collaris	Trogoniformes	Trogon_collaris	1.41	NA	65.43	NA	6.79941e+06	-66.6084	-2.01291
Trugon terrestris	Columbiformes	Trugon_terrestris	1.7	NA	400	NA	651764	140.68	-5.40783
Turdus chiguanco	Passeriformes	Turdus_chiguanco	1.44	NA	93.29	NA	478698	-73.4516	-13.5606
Turdus leucops	Passeriformes	Turdus_leucops	1.32	NA	62.4	NA	490058	-70.7876	-1.2992
Turdus merula	Passeriformes	Turdus_merula	1.51	80	102.73	1.9684	1.43354e+07	40.0463	40.8762
Turdus migratorius	Passeriformes	Turdus_migratorius	1.39	NA	78.5	1.69904	1.79456e+07	-106.514	49.3461
Turdus nigriceps	Passeriformes	Turdus_nigriceps	1.35	NA	52.7	NA	654581	-69.7302	-15.9155
Turdus olivaceus	Passeriformes	Turdus_olivaceus	1.62	NA	67.29	NA	744935	23.3793	-29.0996
Turdus philomelos	Passeriformes	Turdus_philomelos	1.93	NA	67.74	1.68868	1.76832e+07	47.1477	51.1677
Turdus reevei	Passeriformes	Turdus_reevei	1.37	NA	61	NA	77262.7	-80.0082	-2.9402
Turnix sylvaticus	Charadriiformes	Turnix_sylvaticus	1.26	NA	52.69	0.6	1.7314e+07	47.2241	3.62632
Tyrannulus elatus	Passeriformes	Tyrannulus_elatus	1.46	NA	7	NA	6.40495e+06	-64.6284	-1.95946
Tyrannus melancholicus	Passeriformes	Tyrannus_melancholicus	1.3	NA	37.4	NA	1.65044e+07	-61.9806	-9.03114
Tyrannus tyrannus	Passeriformes	Tyrannus_tyrannus	1.25	NA	39.85	0.9842	1.66486e+07	-88.2277	27.4233
Tyto alba	Strigiformes	Tyto_alba	1.53	NA	403.32	6.74436	6.31287e+07	1.16719	3.19404
Upucerthia albigula	Passeriformes	Upucerthia_albigula	1.28	NA	39.9	NA	48213.3	-71.5858	-16.7243
Upupa epops	Coraciiformes	Upupa_epops	1.28	NA	66.93	1.18748	5.13211e+07	58.2031	26.994
Uraeginthus angolensis	Passeriformes	Uraeginthus_angolensis	1.27	NA	9.9	NA	3.46021e+06	28.4059	-16.688
Urocolius indicus	Coliiformes	Urocolius_indicus	1.53	NA	52.7	1.10852	3.46254e+06	24.9971	-21.7611
Urolestes melanoleucus	Passeriformes	Urolestes_melanoleucus	1.19	NA	82.2	NA	1.7074e+06	26.4597	-18.6248
Vanellus coronatus	Charadriiformes	Vanellus_coronatus	1.67	NA	165	2.19064	6.79032e+06	28.316	-14.0125
Veniliornis callonotus	Piciformes	Veniliornis_callonotus	1.49	NA	26.47	NA	136204	-79.9028	-3.22098
Vidua chalybeata	Passeriformes	Vidua_chalybeata	1.16	NA	12.5	0.517	6.96297e+06	20.7335	1.3449
Vidua macroura	Passeriformes	Vidua_macroura	1.08	NA	15.74	0.5505	1.31756e+07	20.7525	-2.71036
Vidua paradisaea	Passeriformes	Vidua_paradisaea	1.18	NA	20.35	0.66304	4.67464e+06	31.5485	-11.0485
Vireo gilvus	Passeriformes	Vireo_gilvus	1.31	NA	12.67	NA	1.17179e+07	-105.47	42.4069
Vireo olivaceus	Passeriformes	Vireo_olivaceus	1.25	NA	16.06	0.63196	2.47283e+07	-76.8719	15.7059
Vireo philadelphicus	Passeriformes	Vireo_philadelphicus	1.35	NA	11.5	NA	6.27851e+06	-93.5154	43.1627
Wilsonia canadensis	Passeriformes	Wilsonia_canadensis	1.49	NA	10.04	NA	8.70079e+06	-85.6776	34.9985
Xenodacnis parina	Passeriformes	Xenodacnis_parina	1.25	NA	11.5	NA	55446.4	-73.4014	-13.2731
Xenospingus concolor	Passeriformes	Xenospingus_concolor	1.38	NA	21	NA	29630.1	-72.8752	-16.6225
Xiphorhynchus ocellatus	Passeriformes	Xiphorhynchus_ocellatus	1.38	NA	36.66	NA	1.26e+06	-65.7713	-6.2362
Zenaida auriculata	Columbiformes	Zenaida_auriculata	1.41	NA	110.2	1.23284	1.1532e+07	-59.295	-20.3592
Zonotrichia albicollis	Passeriformes	Zonotrichia_albicollis	1.33	NA	24.4	1.0878	1.17325e+07	-96.13	46.9528
Zonotrichia leucophrys	Passeriformes	Zonotrichia_leucophrys	1.32	NA	28	1.00492	1.79514e+07	-105.855	50.1704
Zosterops pallidus	Passeriformes	Zosterops_pallidus	1.35	NA	11.1	NA	420001	21.8875	-27.1563

## Sheet: Description
Variable	Description
Species	Scientific species name
Order	Taxonomic order
Species_label	Species label (on a phylogenetic tree)
Genome_C_value	Genome size - C value
Genome_Chr	Number of chromosomes
Body_mass	Body mass [g]
Brain_mass	Brain mass [g]
Range	Range size [km2]
X	Geographic longitude (centroid)
Y	Geographic latitude (centroid)
